# Supplementary material for: Electrogenerated chemiluminescence of the lithium salts of 8-hydroxyquinoline and 2-methyl-8-hydroxyquinoline
Source: Royal Society of Chemistry journal article supplement (doi:10.1039/b608145b), 2006-01-01
Supplement: b608145b.pdf [file b608145b.pdf]

**Electrogenerated Chemiluminescence of the Lithium Salts of 8-hydroxyquinoline  
and 2-methyl-8-hydroxyquinoline**

David J. Vinyard and Mark M. Richter\*,

Department of Chemistry, Missouri State University,

Springfield, Missouri 65897, USA.

Email: MarkRichter@MissouriState.edu

**Supplementary Material**

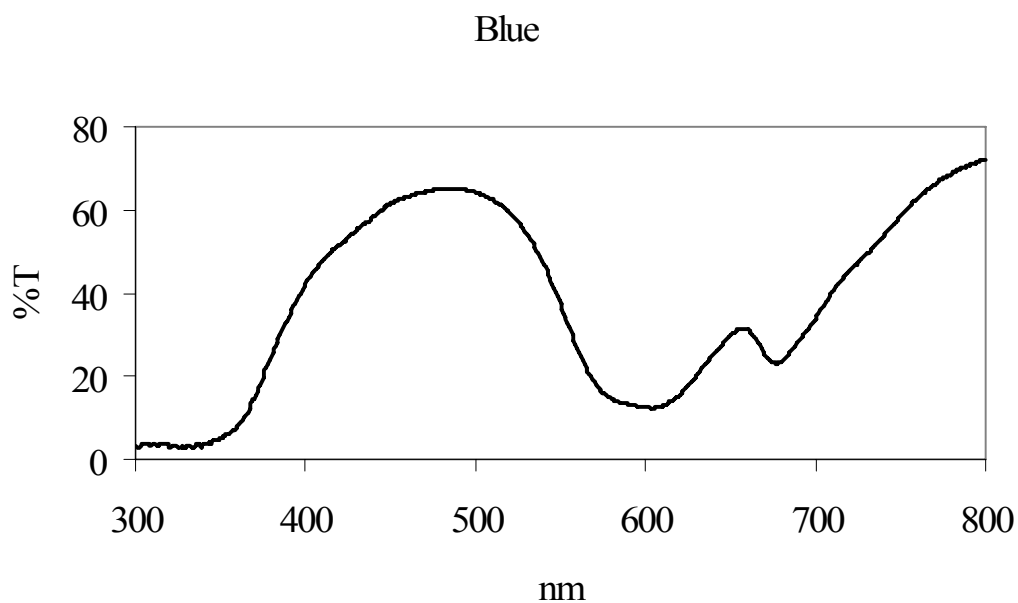

**Figure S.1.** Percent transmittance of the blue plastic absorption filter.

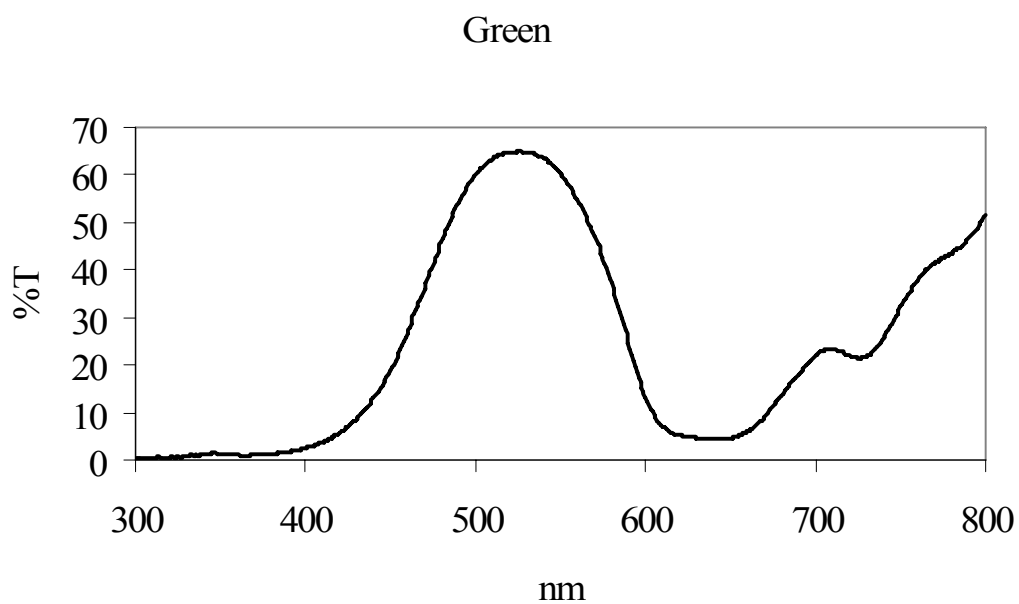

**Figure S.2.** Percent transmittance of the green plastic absorption filter.

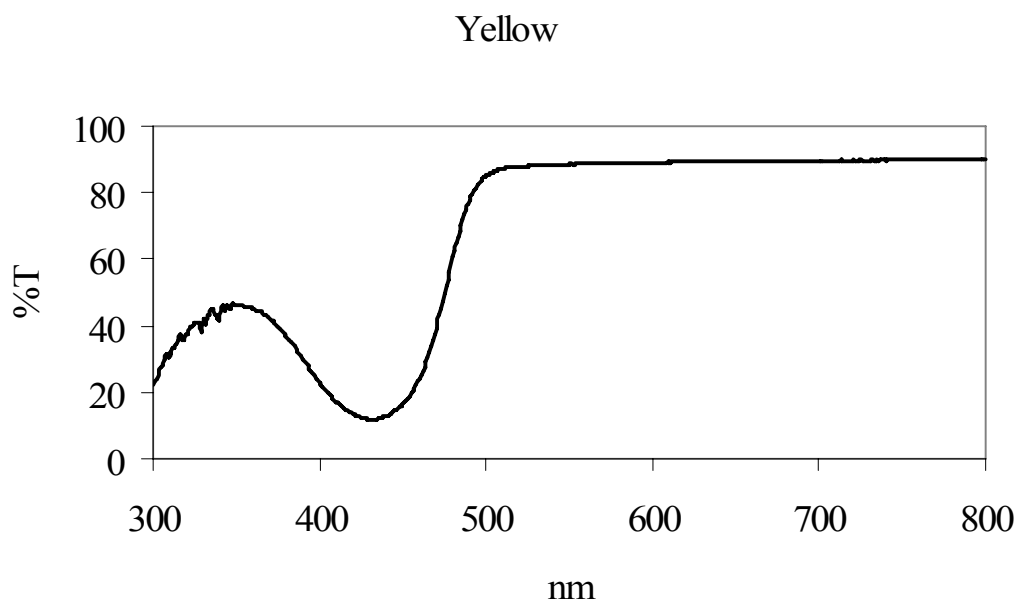

**Figure S.3.** Percent transmittance of the yellow plastic absorption filter.

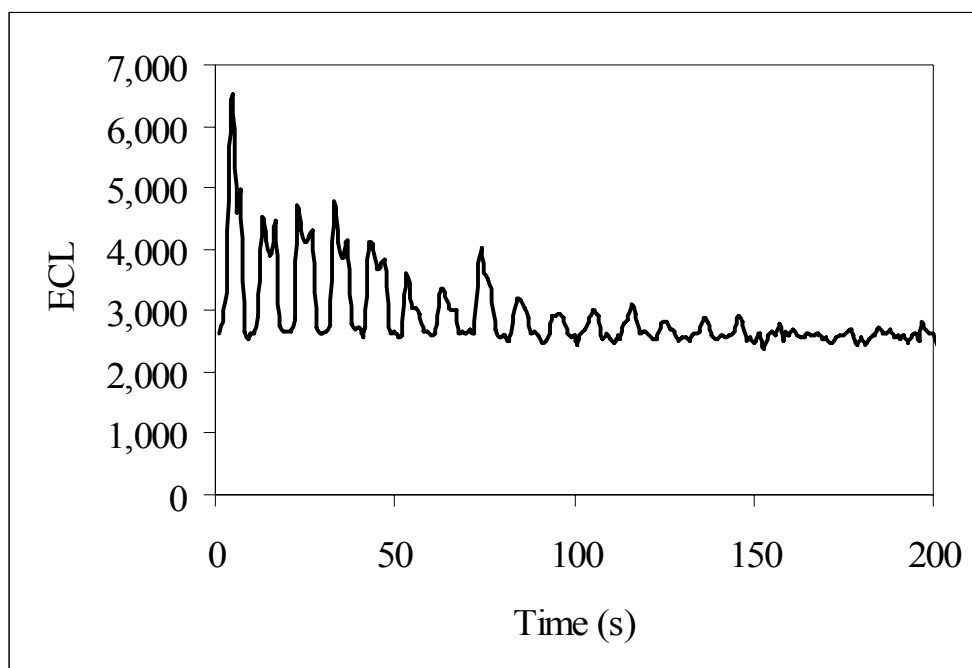

**Figure S.4.** ECL Intensity versus time for  $[(q)(qH)Li]_x$  in Bioveris Assay Buffer. Potential was swept from 0 to +2.0 to 0V at a scan rate of 100 mV/sec. Each “peak” corresponds to one cyclic voltammetric sweep.

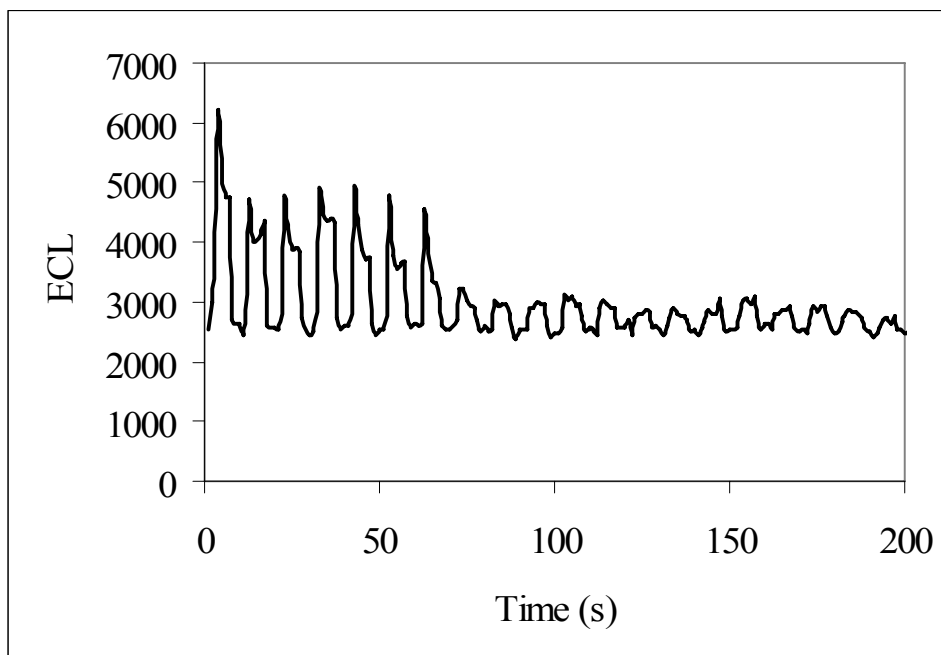

**Figure S.5.** ECL Intensity versus time for  $[(\text{Meq})(\text{MeqH})\text{Li}]_x$  in Bioveris Assay Buffer. Potential was swept from 0 to +2.0 to 0V at a scan rate of 100 mV/sec. Each “peak” corresponds to one cyclic voltammetric sweep.
